# Supplementary material
Source: bioRxiv or medRxiv preprint supplement (https://www.biorxiv.org/highwire/filestream/118112/field_highwire_adjunct_files/2/389197-3.pdf)
Supplement: Supplementary file [file 389197-3.pdf]

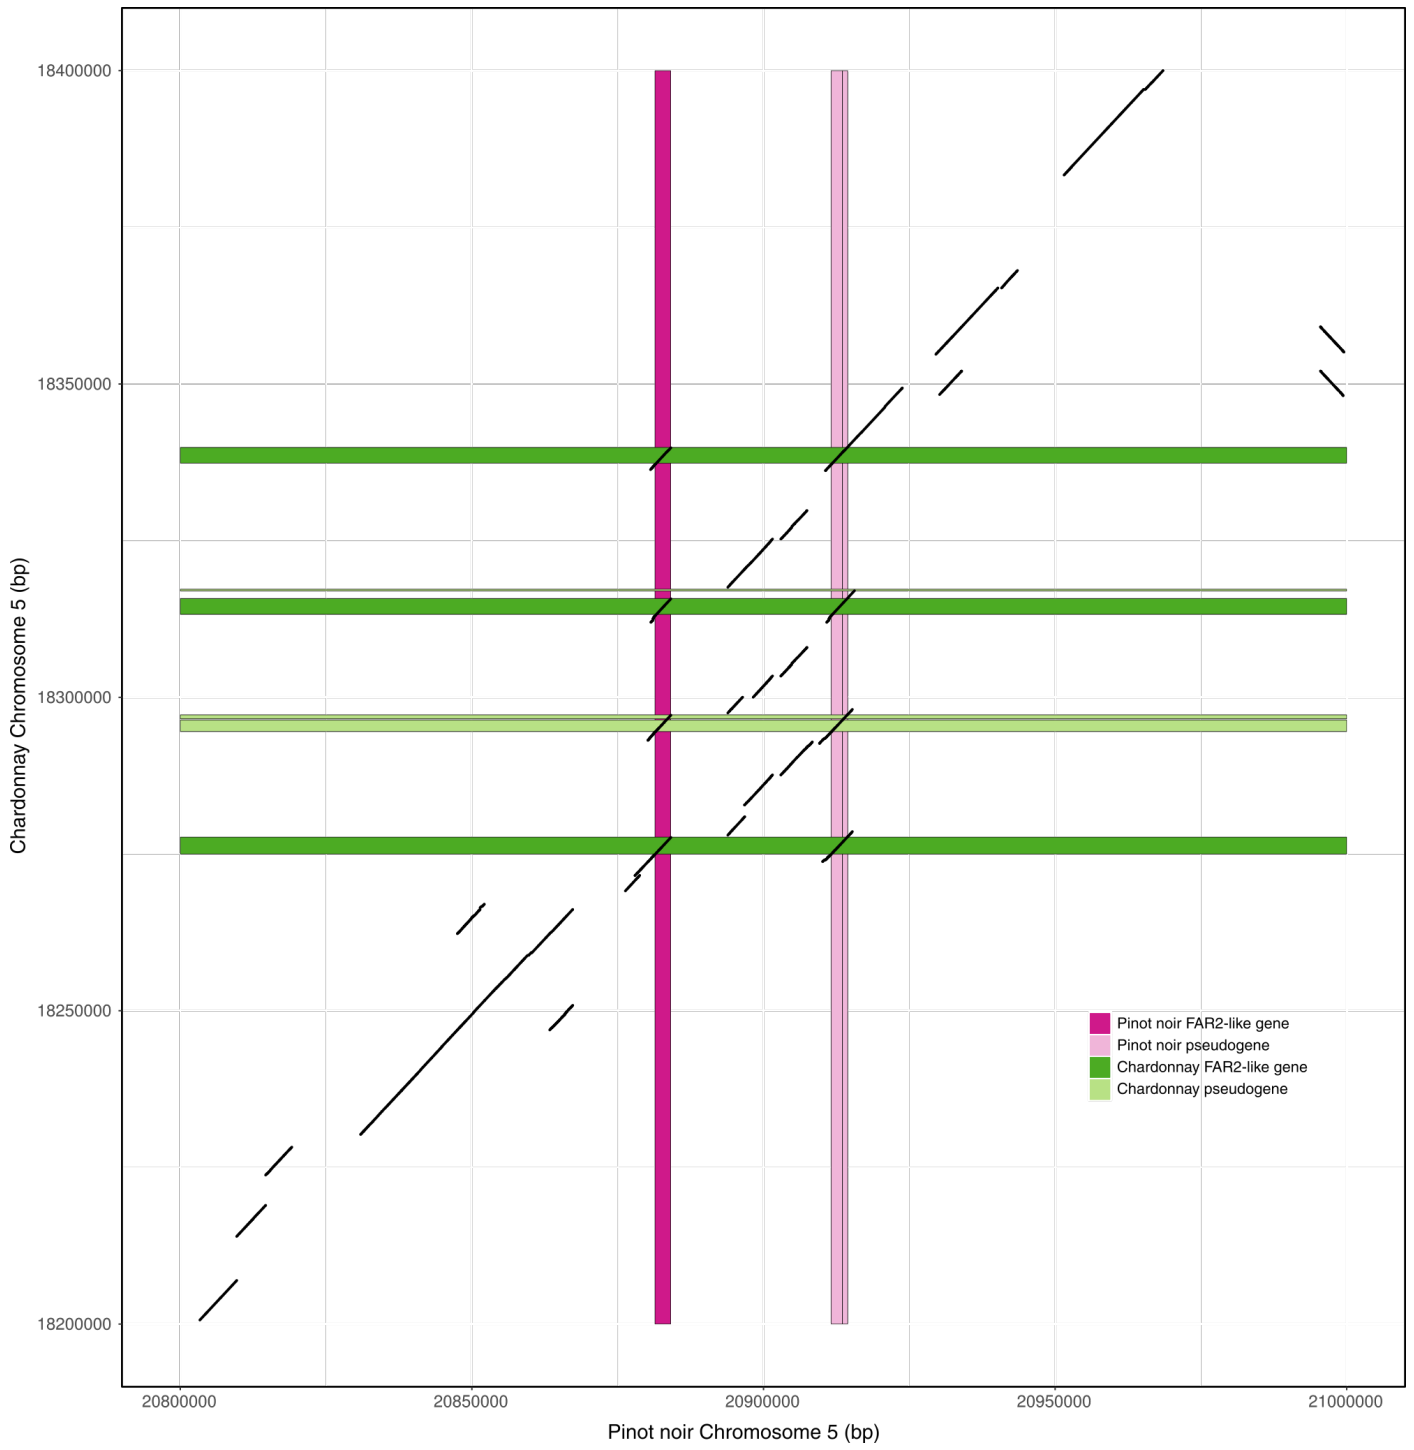

**S3 Figure: Gene expansion of Chardonnay Chromosome 5 (primary contigs) region containing FAR2-like genes.** Alignments are indicated as black lines (dotplot), the ORFs for FAR2-like genes and pseudogenes are indicated for both Pinot noir and Chardonnay.
